# Supplementary material for: Coral reef carbonate budgets and ecological drivers in thenaturally high temperature and high total alkalinity environment of the Red Sea
Source: Copernicus journal article supplement (doi:10.5194/bg-2018-57), 2018-02-28
Supplement: Supplementary file 1 [file bg-2018-57-supplement.pdf]

**Supplementary Materials**

|                                       |    |
|---------------------------------------|----|
| <b>Supplementary Text</b> .....       | 2  |
| <b>Supplementary Equations</b> .....  | 3  |
| <b>Supplementary Tables</b> .....     | 5  |
| <b>Supplementary Figures</b> .....    | 16 |
| <b>Supplementary References</b> ..... | 17 |

## Supplementary Text

**Text S1 Calculation of carbonate budgets.** The following variables were incorporated in the  $G_{\text{budget}}$  estimates: site specific benthic calcification rates ( $G_{\text{benthos}}$ ,  $\text{kg m}^{-1} \text{y}^{-1}$ ), net-accretion/erosion rates of hard substrate ( $G_{\text{netbenthos}}$ ,  $\text{kg m}^{-1} \text{y}^{-1}$ ), and erosion rates of crucial bioeroders such as sea urchins ( $E_{\text{echino}}$ ,  $\text{kg m}^{-1} \text{y}^{-1}$ ) and parrotfishes ( $E_{\text{parrot}}$ ,  $\text{kg m}^{-1} \text{y}^{-1}$ ). First,  $G_{\text{benthos}}$  was estimated using *in situ* measured calcification rates of corals and calcareous crusts as reported by Roik et al. (2015) (Table S3). These calcification rates ( $G_{\text{calcifier}}$ ) were extrapolated over the percentage cover of respective calcifiers assessed in six 10 m rugosity transects per site (Equation box S1 a, Table S4). Transects were performed following Perry et al., (2012) and transect data were previously reported in detail in Roik et al. (2015). At the sandy bottom dominated, lagoonal midshore site, transect locations were selected based on availability of hard reef substrate.

To account for the carbonate net-accretion/erosion of the hard substrate category “rock”/ “recently dead coral”,  $G_{\text{netbenthos}}$  rates were calculated for each reef site using  $G_{\text{net}}$  rates derived from limestone block assays (Equation box S1 b, Table S3). To estimate echinoid erosion rates ( $E_{\text{echino}}$ ), abundances of major sea urchin genera and their size classes per reef site were assessed. The sea urchin census was conducted along the benthic rugosity transects between 9.00 and 14.00 h, and included the most common bioerosive genera *Diadema*, *Echinometra*, *Echinostrephus*, and *Eucidaris* in five size classes (1 = 0 - 20, 2 = 21 - 40, 3 = 41 - 60, 4 = 61 - 80, 5 = 81 - 100 mm urchin diameter). Genus and size specific erosion rates for sea urchins were employed in equations *sensu* Perry et al., (2012) to estimate erosion rates per individual echinoid genus (Equation box S2 (a) - (c), Table S5 - 6). Parrotfish abundances per species and fork length (FL size categories: 1 = 5 - 14 cm, 2 = 15 - 24 cm, 3 = 25 - 34 cm, 4 = 35 - 44 cm, 5 = 45 - 70, and 6 > 70 cm) were recorded in stationary visual census count surveys ( $n = 6$ , plot  $\varnothing = 15$  m, duration = 10 min, 9.30 am - 12.00 pm, distance between plots 20 m, adapted from Bannerot and Bohnsack, 1986, Table S7). Care was taken not to count any individual parrotfish more than once. Parrotfish species- or genus-specific abundance data were normalized to survey time and plot area, and converted into erosion rates via calculations based on size-specific estimates for bite rate and volume for several Red Sea taxa, under the assumption of 10 h of feeding activity per day; shown in Table S8 (Alwany et al., 2009; Hoey et al., 2015). Specifically, bite rates and volumes were adjusted according to the percentage of bites leaving scars, and to fish size using the relationship between bite volume and average fork length, using Equations S3 c and d (Bruggemann et al., 1994, 1996) as recommended in (Perry et al., 2012). These specific erosion rates as well as abundances were used to calculate parrotfish erosion rates ( $E_{\text{parrot}}$ ) per site (Equation box S3 (a) - (b), Table S7 - 9).

## Supplementary Equations

### Equation box S1 Benthic community calcification and net-accretion/erosion of bare reef substrate ( $G_{\text{benthos}}$ and $G_{\text{netbenthos}}$ )

|                                                                          |                                                                                     |
|--------------------------------------------------------------------------|-------------------------------------------------------------------------------------|
| <b>Legend:</b>                                                           |                                                                                     |
| Rugosity:                                                                | R                                                                                   |
| Transect planar length:                                                  | d1 [m]                                                                              |
| Rugosity length:                                                         | d2 [m]                                                                              |
| Percentage cover of a category in a transect:                            | COV [%]                                                                             |
| Calcifier transect category:                                             | CAT                                                                                 |
| Sum of <i>Rock</i> and <i>Recently Dead Coral</i> (transect categories): | RCDC                                                                                |
| Accretion/calcification per benthos category:                            | $G_{\text{Calcifier}}(\text{CAT})^{\#}$<br>$G_{\text{net}}(\text{CAT})^{\#}$        |
| <b>Equations:</b>                                                        |                                                                                     |
| (a)                                                                      | $G_{\text{benthos}} = \sum_{k=\text{CAL}} G_{\text{Calcifier}}(k) * R * \text{COV}$ |
| (b)                                                                      | $G_{\text{netbenthos}} = G_{\text{net}}(\text{RCDC}) * R * \text{COV}$              |
| (c)                                                                      | $R = d2 / d1$                                                                       |
| #see Table S3                                                            |                                                                                     |

### Equation box S2 Sea urchin bioerosion ( $E_{\text{echino}}$ )

|                                                                  |                                                                            |
|------------------------------------------------------------------|----------------------------------------------------------------------------|
| <b>Legend:</b>                                                   |                                                                            |
| Bioerosion rate per individual <i>Diadema</i> <sup>#</sup> :     | $E_{\text{echinoIndvD}}$ [kg individuals <sup>-1</sup> y <sup>-1</sup> ]   |
| Bioerosion rate per individual <i>Echinometra</i> <sup>#</sup> : | $E_{\text{echinoIndvE}}$ [kg individuals <sup>-1</sup> y <sup>-1</sup> ]   |
| Bioerosion rate per individual <i>Other</i> <sup>#</sup> :       | $E_{\text{echinoIndvO}}$ [kg individuals <sup>-1</sup> y <sup>-1</sup> ]   |
| Size class averages:                                             | S [mm] {10, 30, 50, 70, 90}                                                |
| Echinoid abundance per reef site (census based):                 | $\text{Abund}_{\text{echino}}$ [individuals m <sup>-2</sup> ]              |
| <b>Echinoid bioerosion rate per reef site:</b>                   | <b><math>E_{\text{echino}}</math> [kg m<sup>-2</sup> y<sup>-1</sup>]</b>   |
| <b>Equations:</b>                                                |                                                                            |
| (a)                                                              | $E_{\text{echino}} = E_{\text{echinoIndv}} * \text{Abund}_{\text{echino}}$ |
| (b)                                                              | $E_{\text{echinoIndvD}}(S) = 0.0029 * S^{1.6624} * 0.001 * 365$            |
| (c)                                                              | $E_{\text{echinoIndvE}}(S) = 0.0007 * S^{1.7309} * 0.001 * 365$            |
| (d)                                                              | $E_{\text{echinoIndvO}}(S) = 0.00008 * S^{2.4537} * 0.001 * 365$           |
| #from <i>ReefBudget</i> (Perry et al., 2012)                     |                                                                            |

**Equation box S3 Parrotfish bioerosion ( $E_{\text{parrot}}$ )****Legend:**

|                                                                     |                                                                            |
|---------------------------------------------------------------------|----------------------------------------------------------------------------|
| Bioerosion rate per individual <i>Cetoscarus bicolor</i> *:         | $E_{\text{parrotIndvBIC}}$ [kg individual <sup>-1</sup> y <sup>-1</sup> ]  |
| Bioerosion rate per individual <i>Chlorurus gibbus</i> *:           | $E_{\text{parrotIndvGIB}}$ [kg individual <sup>-1</sup> y <sup>-1</sup> ]  |
| Bioerosion rate per individual <i>Chlorurus sordidus</i> *:         | $E_{\text{parrotIndvSOR}}$ [kg individual <sup>-1</sup> y <sup>-1</sup> ]  |
| Bioerosion rate per individual <i>Scarus ferrugineus</i> *:         | $E_{\text{parrotIndvFER}}$ [kg individual <sup>-1</sup> y <sup>-1</sup> ]  |
| Bioerosion rate per individual <i>Scarus frenatus</i> *:            | $E_{\text{parrotIndvFREN}}$ [kg individual <sup>-1</sup> y <sup>-1</sup> ] |
| Bioerosion rate per individual <i>Scarus ghobban</i> *:             | $E_{\text{parrotIndvGHO}}$ [kg individual <sup>-1</sup> y <sup>-1</sup> ]  |
| Bioerosion rate per individual <i>Scarus niger</i> *:               | $E_{\text{parrotIndvNIG}}$ [kg individual <sup>-1</sup> y <sup>-1</sup> ]  |
| Bioerosion rate per individual Other Scaridae*:                     | $E_{\text{parrotIndvSCAR}}$ [kg individual <sup>-1</sup> y <sup>-1</sup> ] |
| Bioerosion rate per individual <i>Hipposcarus harid</i> **:         | $E_{\text{parrotIndvHAR}}$ [kg individual <sup>-1</sup> y <sup>-1</sup> ]  |
| Average fork length averages:                                       | FL [cm] {10, 20, 30, 40, 57, 100}                                          |
| Species specific bite volume (from Table S8):                       | BVol <sub>species</sub> [cm <sup>3</sup> ]                                 |
| Species specific bite rate (from Table S8):                         | Brate [b minute <sup>-1</sup> ]                                            |
| Fork length specific bite volume (Bruggemann et al., 1994):         | BVol <sub>Bruggemann</sub> [cm <sup>3</sup> ]                              |
| Fork size adjustment factor <sup>#</sup> (Bruggemann et al., 1994): | factor <sub>Bruggemann</sub>                                               |
| % of bites leaving scars (Bruggemann et al., 1996):                 | B %                                                                        |
| Adjusted species and fork size specific bite volume:                | BVol <sub>adj</sub> [cm <sup>3</sup> ]                                     |
| Size Adjusted bite rate:                                            | Brate <sub>adj</sub> [b minute <sup>-1</sup> ]                             |
| Reef carbonate density (Alwany et al., 2009):                       | $\rho = 1.4$ [g cm <sup>-3</sup> ]                                         |
| Hour of active feeding y per day (Alwany et al., 2009):             | $h_{\text{Feed}} = 10$ [h]                                                 |
| Bioerosion rate per individual:                                     | $E_{\text{parrotIndv}}$ [kg individual <sup>-1</sup> y <sup>-1</sup> ]     |
| Parrot fish abundance (census based):                               | Abund <sub>parrot</sub> [individuals m <sup>-2</sup> ]                     |
| <b>Parrot fish bioerosion rate per reef site:</b>                   | <b><math>E_{\text{parrot}}</math> [kg m<sup>-2</sup> y<sup>-1</sup>]</b>   |

**Equations:**

- (a)  $E_{\text{parrot}} = E_{\text{parrotIndv}} * \text{Abund}_{\text{parrot}}$   
 (b)  $E_{\text{parrotIndv}} = \text{Brate}_{\text{Adj}} * \text{BVol}_{\text{Adj}} * \rho * 60\text{min} * h_{\text{Feed}} * 365 * 0.001$   
 (c)  $\text{BVol}_{\text{Adj}}(\text{FL}) = \text{BVol}_{\text{Species}} * \text{factor}_{\text{Bruggeman}}(\text{FL})$   
 (d)  $\text{Brate}_{\text{Adj}}(\text{FL}) = \text{B} \% / 100 * \text{Brate}$   
 (e)  $\text{factor}_{\text{Bruggeman}}(\text{FL}) = \text{BVol}_{\text{Bruggemann}}(\text{FL}) / \text{BVol}_{\text{Bruggemann}}(40)$   
 (f)  $\text{BVol}_{\text{Bruggemann}} = 1.362 * 10^{-6} * \text{FL}^3$

\* based on Alwany et al. 2009

\*\* based on Hoey et al. 2015

<sup>#</sup>Relative to FL = 40

## Supplementary Tables

**Table S1 Sampling schedule for seawater samples**

| Inorganic nutrients | Total alkalinity and pH <sub>(discrete)</sub> | Season |
|---------------------|-----------------------------------------------|--------|
| 08.12.2013, n = 1   | -                                             | winter |
| 05.03.2014, n = 1   | 05.03.2014, n = 3                             | winter |
| 10.03.2014, n = 1   | 10.03.2014, n = 3                             | winter |
| 17.03.2014, n = 1   | 17.03.2014, n = 3                             | winter |
| 26.03.2014, n = 1   | 26.03.2014, n = 3                             | winter |
| 23.06.2014, n = 1   | 23.06.2014, n = 3                             | summer |
| 16.07.2014, n = 1   | 16.07.2014, n = 3                             | summer |
| 20.08.2014, n = 1   | 20.08.2014, n = 3                             | summer |
| 28.08.2014, n = 1   | 28.08.2014, n = 3                             | summer |
| 04.09.2014, n = 1   | 04.09.2014, n = 3                             | summer |
| 10.09.2014, n = 1   | 10.09.2014, n = 3                             | summer |

Dates = dd.mm.yyyy

**Table S2 Linear drift corrections were applied on data collected by CTD integrated pH sensors (SBE 18/27, Sea-Bird)**

| Reef site          | Deployment season | Linear drift at pH 7    |
|--------------------|-------------------|-------------------------|
| nearshore_exposed  | winter            | $y = -0.0143x + 7.0278$ |
| nearshore_exposed  | summer            | $y = 1.1318x + 5.8272$  |
| midshore_sheltered | winter            | $y = 0.0085x + 6.9915$  |
| midshore_sheltered | summer            | $y = 0.691x + 6.2733$   |
| midshore_exposed   | winter            | $y = -0.0136x + 7.0329$ |
| midshore_exposed   | summer            | $y = 0.5059x + 6.5208$  |
| offshore_exposed   | winter            | $y = -0.0845x + 7.1095$ |
| offshore_exposed   | summer            | $y = 0.5596x + 6.4256$  |

**Table S3 Table of site specific calcification and net-accretion/erosion rates *in situ* assigned to benthic transect categories.**

| Transect Code                                                        | Benthos category                    | Assigned calcification rate ( $G_{\text{calcifier}}$ ) | Nearshore exposed* | Midshore Sheltered (lagoon) | Midshore exposed | Offshore exposed |
|----------------------------------------------------------------------|-------------------------------------|--------------------------------------------------------|--------------------|-----------------------------|------------------|------------------|
| HCB                                                                  | Other Hard Coral (branching)        | $G_{\text{HCB}} = \text{avg ACR POC}$                  | 1.753<br>(0.021)   | 2.514<br>(0.928)            | 3.119<br>(0.886) | 3.598<br>(1.257) |
| HCE                                                                  | Other Hard Coral (encrusting)       | $G_{\text{HCE}} = \text{avg ACR POC POR}$              | 2.842<br>(1.295)   | 2.888<br>(1.39)             | 3.341<br>(2.339) | 4.246<br>(1.78)  |
| HCM                                                                  | Other Hard Coral (massive)          | $G_{\text{HCM}} = \text{avg POC}$                      | 2.732<br>(0.608)   | 2.732<br>(0.608)            | 3.469<br>(0.901) | 4.11<br>(1.247)  |
| HCP                                                                  | Other Hard Coral (platy/foliose)    | $G_{\text{HCP}} = \text{avg ACR POC POR}$              | 2.842<br>(1.295)   | 2.888<br>(1.39)             | 3.341<br>(2.339) | 4.246<br>(1.78)  |
| ACR                                                                  | Acroporidae                         | $G_{\text{ACR}} = \text{avg ACR}$                      | 1.753<br>(0.021)   | 2.362<br>(1.105)            | 2.699<br>(0.737) | 3.151<br>(1.156) |
| POC                                                                  | Pocilloporidae                      | $G_{\text{POC}} = \text{avg POC}$                      | 2.732<br>(0.608)   | 2.732<br>(0.608)            | 3.469<br>(0.901) | 4.11<br>(1.247)  |
| POR                                                                  | Poritidae                           | $G_{\text{POR}} = \text{avg POR}$                      | 3.93<br>(0.537)    | 4.16<br>(2.021)             | 3.83<br>(4.257)  | 6.673<br>(1.299) |
| CC                                                                   | Calcareous crusts (coralline algae) | $G_{\text{CC}} = \text{avg CC}$                        | 0.138<br>(0.042)   | 0.151<br>(0.042)            | 0.263<br>(0.084) | 0.411<br>(0.08)  |
| <b>Assigned accretion/erosion rate (<math>G_{\text{net}}</math>)</b> |                                     |                                                        |                    |                             |                  |                  |
| DC                                                                   | Recently Dead Coral                 | $G_{\text{DC}} = \text{avg } G_{\text{net}}$           | -0.787<br>(-0.16)  | -0.116<br>(0.615)           | 0.036<br>(0.201) | 0.227<br>(0.096) |
| RC                                                                   | Rock                                | $G_{\text{RC}} = \text{avg } G_{\text{net}}$           | -0.787<br>(-0.16)  | -0.116<br>(0.615)           | 0.036<br>(0.201) | 0.227<br>(0.096) |

Calcification rates  $G_{\text{calcifier}}$  ( $\text{kg m}^{-2} \text{y}^{-1}$ ) are averaged per reef site from Roik et al. (2015).

Average net-accretion rates  $G_{\text{net}}$  ( $\text{kg m}^{-2} \text{y}^{-1}$ ) are based on the deployment of limestone blocks in this study.

\*Since calcification rate for Pocilloporidae (POC) was not measured for the nearshore exposed reef, the average from the midshore sheltered site is used.

Avg = average; standard deviation in parenthesis

**Table S4 Census-based benthos community calcification ( $G_{\text{benthos}}$ ) and benthos net-accretion/erosion rates ( $G_{\text{netbenthos}}$   $\text{kg m}^{-2} \text{y}^{-1}$ )**

| Reef               | $G_{\text{HCB}}$ | $G_{\text{HCE}}$ | $G_{\text{HCM}}$ | $G_{\text{HCP}}$ | $G_{\text{ACR}}$ | $G_{\text{POC}}$ | $G_{\text{POR}}$ | $G_{\text{CC}}$  | $G_{\text{benthos}}$ | $G_{\text{DC}}$   | $G_{\text{RC}}$   | $G_{\text{netbenthos}}$ |
|--------------------|------------------|------------------|------------------|------------------|------------------|------------------|------------------|------------------|----------------------|-------------------|-------------------|-------------------------|
| Nearshore exposed  | 0.034<br>(0.038) | 0.097<br>(0.066) | 0.139<br>(0.05)  | 0<br>(0)         | 0.007<br>(0.018) | 0.009<br>(0.011) | 0.138<br>(0.091) | 0.002<br>(0.002) | 0.426<br>(0.149)     | -0.004<br>(0.007) | -0.311<br>(0.128) | -0.315<br>(0.129)       |
| Midshore sheltered | 0.136<br>(0.115) | 0.094<br>(0.092) | 0.531<br>(0.178) | 0.116<br>(0.283) | 0.11<br>(0.217)  | 0.039<br>(0.033) | 0.125<br>(0.078) | 0.001<br>(0.001) | 1.15<br>(0.222)      | 0<br>(0.001)      | -0.027<br>(0.014) | -0.027<br>(0.014)       |
| Midshore exposed   | 0.005<br>(0.013) | 0.181<br>(0.171) | 0.367<br>(0.321) | 0.042<br>(0.08)  | 0.385<br>(0.174) | 0.37<br>(0.234)  | 0.373<br>(0.216) | 0.039<br>(0.034) | 1.762<br>(0.242)     | 0.002<br>(0.001)  | 0.007<br>(0.003)  | 0.009<br>(0.003)        |
| Offshore exposed   | 0.12<br>(0.198)  | 0.382<br>(0.226) | 0.408<br>(0.353) | 0.064<br>(0.136) | 0.352<br>(0.546) | 0.315<br>(0.246) | 1.018<br>(0.76)  | 0.155<br>(0.039) | 2.812<br>(0.646)     | 0.007<br>(0.007)  | 0.086<br>(0.027)  | 0.094<br>(0.022)        |

Means over six replicates; standard deviation in parenthesis

**Table S5 Overall sea urchin abundances, size ranges, and estimated biomasses m<sup>-2</sup>.**

| Site               | Abundance (individuals m <sup>-2</sup> ) | Size range (categories) | Biomass (g sea urchin m <sup>-2</sup> ) |
|--------------------|------------------------------------------|-------------------------|-----------------------------------------|
| inshore_exposed    | 0.014 (0.006)                            | 1-5                     | 1.43 (0.98)                             |
| inshore_sheltered  | 0.005 (0.003)                            | 2-5                     | 0.98 (0.81)                             |
| midshore_exposed   | 0.002 (0.004)                            | 2-5                     | 0.25 (0.19)                             |
| midshore_sheltered | 0.005 (0.003)                            | 3-5                     | 1.36 (1.07)                             |
| offshore_exposed   | 0.004 (0.002)                            | 1-2                     | 0.05 (0.04)                             |
| offshore_sheltered | 0.007 (0.006)                            | 1-2                     | 0.15 (0.11)                             |

Means over six replicates; standard errors in parenthesis. Size ranges are based on size categories (1 ≤ 20 mm; 2 = 21 - 40 mm; 3 = 41 - 60 mm; 4 = 61 - 80 mm; 5 = 81 - 100 mm). Biomass conversions were based on observed parrotfish abundance and extrapolated based on a fitted model by Wahle and Peckham (1999) for *Strongylocentrotus droebachie*.



**Table S6 Census-based sea urchin bioerosion rates  $E_{echino}$  ( $\text{kg m}^{-2} \text{y}^{-1}$ )**

| <b>Reef</b>        | <b><math>E_{Diadema}</math></b> | <b><math>E_{Echinometra}</math></b> | <b><math>E_{Echinostrephus}</math></b> | <b><math>E_{Eucidaris}</math></b> | <b><math>E_{Other}</math></b> | <b><math>E_{echino}</math></b> |
|--------------------|---------------------------------|-------------------------------------|----------------------------------------|-----------------------------------|-------------------------------|--------------------------------|
| nearshore_exposed  | 0.217<br>(0.184)                | 0.011<br>(0.018)                    | 0 (0)                                  | 0 (0)                             | 0 (0)                         | <b>0.228</b><br><b>(0.189)</b> |
| midshore_sheltered | 0.168<br>(0.185)                | 0 (0)                               | 0.015<br>(0.037)                       | 0.004<br>(0.009)                  | 0 (0)                         | <b>0.187</b><br><b>(0.193)</b> |
| midshore_exposed   | 0.022<br>(0.038)                | 0.002<br>(0.002)                    | 0.001<br>(0.003)                       | 0 (0)                             | 0 (0)                         | <b>0.024</b><br><b>(0.04)</b>  |
| offshore_exposed   | 0.016<br>(0.001)                | 0.002<br>(0.004)                    | 0 (0)                                  | 0 (0)                             | 0 (0)                         | <b>0.019</b><br><b>(0.003)</b> |

Means over six replicates; standard deviations in parenthesis. Grey column = sum of bioerosion rates.

**Table S7 Parrotfish abundances, size ranges, and estimated biomasses m<sup>-2</sup>.**

| <b>Site</b>        | <b>Abundance (individuals m<sup>-2</sup>)</b> | <b>Size range (categories)</b> | <b>Biomass (g parrotfish m<sup>-2</sup>)</b> |
|--------------------|-----------------------------------------------|--------------------------------|----------------------------------------------|
| inshore_exposed    | 0.17 (0.60)                                   | 1-4                            | 82.18 (46.67)                                |
| inshore_sheltered  | 0.15 (0.01)                                   | 1-4                            | 50.85 (5.44)                                 |
| midshore_exposed   | 0.13 (0.01)                                   | 2-5                            | 67.97 (9.21)                                 |
| midshore_sheltered | 0.05 (0.01)                                   | 1-5                            | 19.54 (5.56)                                 |
| offshore_exposed   | 0.08 (0.01)                                   | 1-4                            | 24.69 (6.044)                                |
| offshore_sheltered | 0.10 (0.02)                                   | 1-5                            | 36.62 (8.54)                                 |

Means over six replicates; standard errors in brackets. Size ranges are based on size categories (1 = 5 - 14 cm; 2 = 15 - 24 cm; 3 = 25 - 34 cm; 4 = 35 - 44 cm; 5 = 45 - 69 cm). Biomass conversions are based on observed parrotfish abundance and were converted into biomass estimates based on length-weight relationships for the respective species extracted from fishbase ([www.fishbase.org](http://www.fishbase.org); accessed in December 2015).

**Table S8 Parrotfish species specific bite rates and bite volumes employed in  $E_{\text{parrot}}$  estimation**

| Species                   | Bite rate [b minute <sup>-1</sup> ] | Bite volume [cm <sup>3</sup> ] | Reference                       |
|---------------------------|-------------------------------------|--------------------------------|---------------------------------|
| <i>Cetoscarus bicolor</i> | 5.88                                | 0.110                          | Alwany et al. 2009              |
| <i>Chlorurus gibbus</i>   | 6.38                                | 0.114                          | Alwany et al. 2009              |
| <i>Chlorurus sordidus</i> | 15.30                               | 0.008                          | Alwany et al. 2009              |
| <i>Scarus ferrugineus</i> | 11.88                               | 0.009                          | Alwany et al. 2009              |
| <i>Scarus frenatus</i>    | 10.72                               | 0.011                          | Alwany et al. 2009              |
| <i>Scarus ghobban</i>     | 10.92                               | 0.063                          | Alwany et al. 2009              |
| <i>Scarus niger</i>       | 19.78                               | 0.002                          | Alwany et al. 2009              |
| <i>Hipposcarus harid</i>  | 9.00                                | 0.021                          | Hoey et al. 2015*               |
| Other Scaridae            | 11.23                               | 0.040                          | average of all values used here |

\* bite volume is an average of "scraper" bite volumes from Alwany et al. (2009)

**Table S9 Census-based parrotfish bioerosion rates  $E_{\text{parrot}}$  ( $\text{kg m}^{-2} \text{y}^{-1}$ )**

| reef               | $E_{\text{Cbicolor}}$ | $E_{\text{Cgibbus}}$ | $E_{\text{Csordidus}}$ | $E_{\text{Hharid}}$ | $E_{\text{Scaridae}}$ | $E_{\text{Sferrugineus}}$ | $E_{\text{Sfrenatus}}$ | $E_{\text{Sghobban}}$ | $E_{\text{Sniger}}$ | $E_{\text{parrot}}$             |
|--------------------|-----------------------|----------------------|------------------------|---------------------|-----------------------|---------------------------|------------------------|-----------------------|---------------------|---------------------------------|
| nearshore_exposed  | 0 (0)                 | 0 (0)                | -0.256<br>(0.176)      | -0.112<br>(0.091)   | -0.272<br>(0.138)     | -0.067<br>(0.067)         | -0.02<br>(0.048)       | 0 (0)                 | -0.047<br>(0.024)   | <b>-1.36</b><br><b>(1.886)</b>  |
| midshore_sheltered | 0 (0)                 | 0 (0)                | 0 (0)                  | -0.229<br>(0.254)   | -0.1<br>(0.144)       | -0.01<br>(0.014)          | 0 (0)                  | 0 (0)                 | -0.005<br>(0.009)   | <b>-0.338</b><br><b>(0.271)</b> |
| midshore_exposed   | 0<br>(0.001)          | -0.098<br>(0.23)     | -0.033<br>(0.038)      | -1.07<br>(1.827)    | -0.103<br>(0.136)     | -0.005<br>(0.011)         | 0 (0)                  | -0.05<br>(0.078)      | -0.014<br>(0.014)   | <b>-0.727</b><br><b>(0.307)</b> |
| offshore_exposed   | -0.108<br>(0.203)     | -0.098<br>(0.23)     | -0.046<br>(0.038)      | -0.001<br>(0.002)   | -0.078<br>(0.123)     | -0.023<br>(0.044)         | -0.001<br>(0.001)      | -0.09<br>(0.219)      | -0.015<br>(0.012)   | <b>-0.444</b><br><b>(0.701)</b> |

Means over six replicates; standard deviations in parenthesis. Grey column = sum of bioerosion rates.

**Table S10 Ranges and cross-shelf differences of continuously measured seawater temperature and  $\text{pH}_{(\text{continuous})}$  including carbonate chemistry parameters on coral reefs in the central Red Sea.**

|                                        | Temperature     |               |                    |                        | $\text{pH}_{(\text{continuous})}$ |               |                    |                        | $A_T$                                | $\Omega_a$                            |
|----------------------------------------|-----------------|---------------|--------------------|------------------------|-----------------------------------|---------------|--------------------|------------------------|--------------------------------------|---------------------------------------|
|                                        | avg. daily mean | avg. daily SD | avg. daily min-max | absolute daily min-max | avg. daily mean                   | avg. daily SD | avg. daily min-max | absolute daily min-max | mean                                 | mean                                  |
| <b>winter</b>                          | 26              | 0.1           | 25.8-26.2          | 23.8-27.4              | 8.13                              | 0.12          | 8.00-8.35          | 7.60-9.08              | 2422                                 | 3.77                                  |
| <b>summer</b>                          | 30.9            | 0.2           | 30.6-31.3          | 28.2-32.7              | 8.15                              | 0.08          | 8.05-8.30          | 7.52-9.02              | 2369                                 | 4.00                                  |
| <b>nearshore</b>                       | 29.4            | 0.2           | 29.2-29.7          | 23.8-32.7              | 8.27                              | 0.19          | 8.06-8.60          | 7.53-9.08              | 2414 <sup>a</sup> /2346 <sup>b</sup> | 3.72 <sup>a</sup> /3.93 <sup>b</sup>  |
| <b>offshore</b>                        | 29              | 0.2           | 28.7-29.2          | 25.2-32.2              | 8.12                              | 0.04          | 8.06-8.20          | 7.86-8.61              | 2429 <sup>a</sup> /2393 <sup>b</sup> | 3.87 <sup>a</sup> /4.20 <sup>b</sup>  |
| <b>cross-shelf <math>\Delta</math></b> | ~0.4            | -             | -                  | -                      | ~0.15                             | -             | -                  | -                      | 15 <sup>a</sup> - 47 <sup>b</sup>    | 0.15 <sup>a</sup> - 0.27 <sup>b</sup> |

Temperature ( $^{\circ}\text{C}$ ),  $A_T$  ( $\mu\text{mol kg}^{-1}$ ), avg. = average, SD = standard deviation, min. = minimum, max. = maximum,  $\Delta$  = cross-shelf difference between avg. daily means in nearshore and offshore, a = winter, b = summer

Table S11 Statistical tests characterizing the spatio-seasonal dynamics in abiotic parameters

|                                                            | Reef     | Season   | Season x Reef | Test                                              |                                                           |
|------------------------------------------------------------|----------|----------|---------------|---------------------------------------------------|-----------------------------------------------------------|
|                                                            | <i>p</i> | <i>p</i> | <i>p</i>      |                                                   |                                                           |
| Continuous data                                            |          |          |               |                                                   |                                                           |
| Temp daily means                                           | 0.001    | 0.001    | 0.001         | Univariate PERMANOVA: log(x+1) data               |                                                           |
| Temp daily SDs                                             | 0.003    | 0.001    | 0.001         |                                                   |                                                           |
| Temp daily min.                                            | 0.001    | 0.001    | 0.001         |                                                   |                                                           |
| Temp daily max                                             | 0.001    | 0.001    | 0.001         |                                                   |                                                           |
| pH <sub>(continuous)</sub> daily means                     | 0.001    | 0.001    | 0.001         |                                                   |                                                           |
| pH <sub>(continuous)</sub> daily SDs                       | 0.001    | 0.002    | 0.001         |                                                   |                                                           |
| pH <sub>(continuous)</sub> daily min.                      | 0.001    | 0.001    | 0.001         |                                                   |                                                           |
| pH <sub>(continuous)</sub> daily max.                      | 0.001    | 0.932    | 0.002         |                                                   |                                                           |
| Seawater sampling                                          |          |          |               |                                                   |                                                           |
| Inorganic nutrients                                        | 0.578    | < 0.001  | 0.990         |                                                   | Multivariate PERMANOVA (non-transformed, normalized data) |
| NO <sub>3</sub> <sup>-</sup> &NO <sub>2</sub> <sup>-</sup> | 0.825    | 0.003    | 0.973         | Univariate 2-way ANOVA (boxcox (x+1) transformed) |                                                           |
| NH <sub>4</sub> <sup>+</sup>                               | 0.478    | 0.024    | 0.775         | Univariate 2-way ANOVA (non-transformed)          |                                                           |
| PO <sub>4</sub> <sup>3-</sup>                              | 0.208    | < 0.001  | 0.853         | Univariate 2-way ANOVA (log2 (x+1) transformed)   |                                                           |

**Table S12 Statistical tests for the site and time effect on cumulative net accretion rates ( $G_{net}$ ) measured using limestone blocks.**

| 3-factorial PERMANOVA                   | Pseudo- <i>F</i> | Unique permutations         | <i>p</i>       |
|-----------------------------------------|------------------|-----------------------------|----------------|
| <b>Reef</b>                             | 19.21            | 9940                        | < <b>0.001</b> |
| Exposure                                | 2.02             | 9841                        | 0.166          |
| <b>Deployment time</b>                  | 19.32            | 9947                        | < <b>0.001</b> |
| Reef x Exposure                         | 2.82             | 9955                        | 0.066          |
| <b>Reef x Deployment time</b>           | 11.54            | 9944                        | < <b>0.001</b> |
| <b>Exposure x Deployment time</b>       | 4.29             | 9942                        | <b>0.021</b>   |
| Reef x Exposure x Deployment time       | 1.90             | 9851                        | 0.172          |
| Pair-wise tests                         | <i>t</i>         | Unique permutations         | <i>p</i>       |
| midshore, offshore                      | 1.28             | 9940                        | 0.205          |
| <b>midshore, nearshore</b>              | 4.21             | 9833                        | < <b>0.001</b> |
| <b>offshore, nearshore</b>              | 5.72             | 9819                        | < <b>0.001</b> |
| <b>6-months, 30-months</b>              | 5.47             | 9838                        | < <b>0.001</b> |
| <b>6-months, 12-months</b>              | 4.36             | 9837                        | < <b>0.001</b> |
| <b>30-months, 12-months<sup>#</sup></b> |                  | no test over all reef sites |                |

<sup>#</sup> no pair-wise comparison due to missing data

## Supplementary Figures

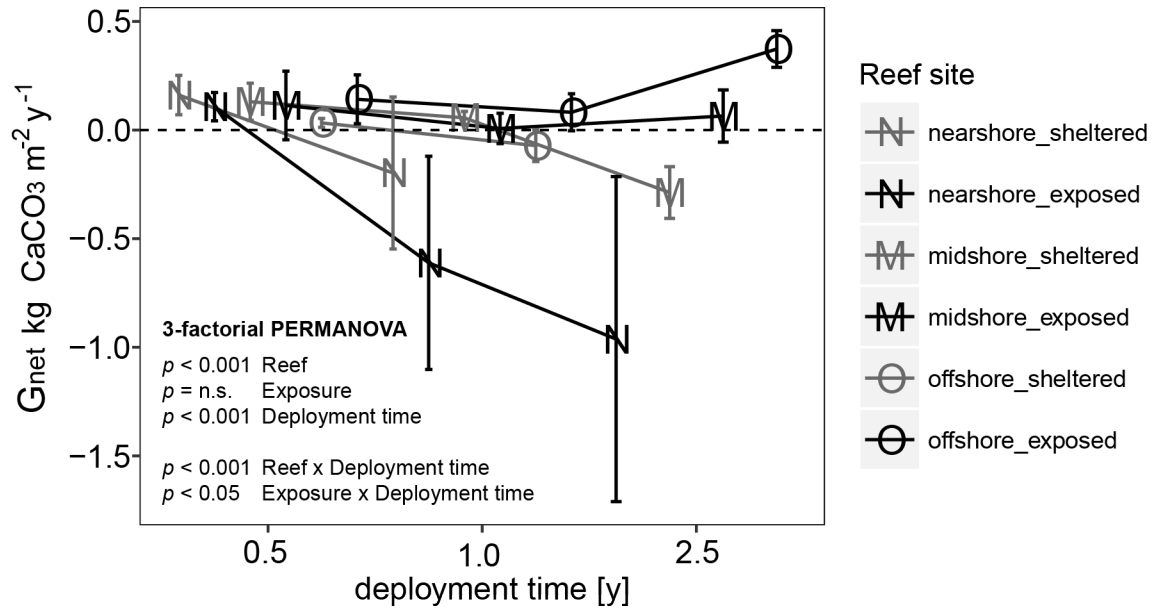

**Figure S1.** Net-accretion/erosion rates ( $G_{\text{net}}$ ) of limestone blocks after 6-30 deployment months in the study sites. The plot lines show the cumulative  $G_{\text{net}}$  measured in limestone blocks after 6, 12 and 30 months (0.5, 1, 2.5 years) of deployment. Significant effects are indicated by PERMANOVA  $p$ -values. Only significant interactions are shown. (EXP = exposed, SHELTER = sheltered). (Also see Figure 4 of the article.)



### Supplementary References

Alwany, M. A., Thaler, E. and Stachowitsch, M.: Parrotfish bioerosion on Egyptian Red Sea reefs, *J. Exp. Mar. Biol. Ecol.*, 371(2), 170–176, doi:10.1016/j.jembe.2009.01.019, 2009.

Bannerot, S. P. and Bohnsack, J. A.: A stationary visual census technique for quantitatively assessing community structure of coral reef fishes, NOAA. [online] Available from: <http://core.kmi.open.ac.uk/download/pdf/11018492.pdf> (Accessed 1 September 2014), 1986.

Bruggemann, J., van Oppen, M. and Breeman, A.: Foraging by the stoplight parrotfish *Sparisoma viride*. I. Food selection in different, socially determined habitats, *Mar. Ecol. Prog. Ser.*, 106, 41–55, doi:10.3354/meps106041, 1994.

Bruggemann, J., van Kessel, A., van Rooij, J. and Breeman, A.: Bioerosion and sediment ingestion by the Caribbean parrotfish *Scarus vetula* and *Sparisoma viride*: implications of fish size, feeding mode and habitat use, *Mar. Ecol. Prog. Ser.*, 134, 59–71, doi:10.3354/meps134059, 1996.

Hoey, A. S., Feary, D. A., Burt, J. A., Vaughan, G., Pratchett, M. S. and Berumen, M. L.: Regional variation in the structure and function of parrotfishes on Arabian reefs, *Mar. Pollut. Bull.*, doi:10.1016/j.marpolbul.2015.11.035, 2015.

Perry, C., Edinger, E., Kench, P., Murphy, G., Smithers, S., Steneck, R. and Mumby, P.: Estimating rates of biologically driven coral reef framework production and erosion: a new census-based carbonate budget methodology and applications to the reefs of Bonaire, *Coral Reefs*, 31(3), 853–868, doi:10.1007/s00338-012-0901-4, 2012.

Roik, A., Roder, C., Röthig, T. and Voolstra, C. R.: Spatial and seasonal reef calcification in corals and calcareous crusts in the central Red Sea, *Coral Reefs*, 1–13, doi:10.1007/s00338-015-1383-y, 2015.

Wahle, R. A. and Peckham, S. H.: Density-related reproductive trade-offs in the green sea urchin, *Strongylocentrotus droebachiensis*, *Mar. Biol.*, 134(1), 127–137, doi:10.1007/s002270050531, 1999.
